# Supplementary material for: Genetic Variation/Evolution and Differential Host Responses Resulting from In-Patient Adaptation of Mycobacterium avium
Source: PubMed Central journal article supplement (PMC6434124; doi:10.1128/iai.00323-18), 2019-03-25
Supplement: IAI.00323-18-s0001.pdf [file IAI.00323-18-s0001.pdf]

1 **Supplementary Figure and Table Legends**

2 **FIG S1** Differential melting curves from 16S rRNA gene qRT-PCR. The curves of 19 clinical  
3 MAC isolates as well as positive (*M. intracellulare* and Mtb) and negative controls are shown.

4  
5 **FIG S2** Bone marrow derived murine macrophages were infected with clinical stains, collected  
6 in chronological order, at a MOI of 10. After two hours of infection, cells were washed and lysed  
7 to analyze uptake. Uptake is represented as log CFU and designated as zero hour.

8  
9 **FIG S3** Nanostring data. Murine BMDMs were infected with the first and last clinical isolate of  
10 Mav (9.1 and 9.6) at a MOI of 10. After 6 hours post infection, cells were lysed in RLT buffer  
11 and subsequently RNA was extracted to perform nanostring analysis. nCounter® GX Mouse  
12 Inflammation Kit was used and the results were analyzed on *Partek® Genomics Suite®* software.

13  
14 **FIG S4** Proinflammatory cytokines IL-6 (A) and IL-1 $\beta$  (B) measured from liver homogenates.  
15 Results are presented as ng cytokine per gram tissue.

16 **FIG S5** Accumulated number of SNPs, accounting for sub clones. SNPs were counted relative to  
17 Mav 104 for patients 9 and 13. The isolates from patient 13 were treated as two separate lineages  
18 (13.1-2 and 13.3-4). For patient 4, SNPs in isolates 4.2-4.6 were counted relative to 4.2.

19  
20 **Table S1** Medical history and time line of sample collection for all the patients in the study.

21

22 **Table S2** List of genes containing SNPs. Both synonymous and non-synonymous mutations were  
23 observed. Putative gene function mentioned for non-synonymous mutations. Mav 104 reference  
24 from KEGG database was used to annotate function.

25

26 **Table S3** List of genes containing mutations (relative to Mav104, as an outgroup). Both,  
27 synonymous and non-synonymous mutations were observed. Putative gene function mentioned  
28 for non-synonymous mutations. Mav 104 reference from KEGG database was used to annotate  
29 function. The mutations for patient 13 are highlighted in red and blue to emphasize the two sub-  
30 series of isolates, (13.1, and 13.2) and (13.3, and 13.4). The mutations for patient 4 are  
31 highlighted in red and blue to emphasize the two sub-series of isolates (4.1) and (4.2-4.6)

32

33 **Table S4** Description of mycobacterial isolates; Specimen type, Specimen location, microscopy  
34 quantification and concentration of bacteria

35

36

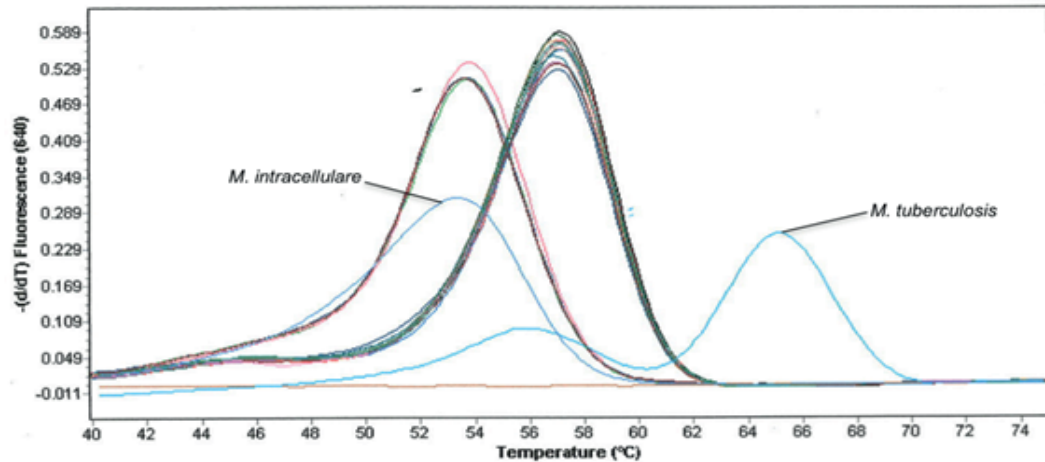

**FIG S1** Differential melting curves from 16S rRNA gene qRT-PCR. The curves of 19 clinical MAC isolates as well as positive (*M. intracellulare* and Mtb) and negative controls are shown.

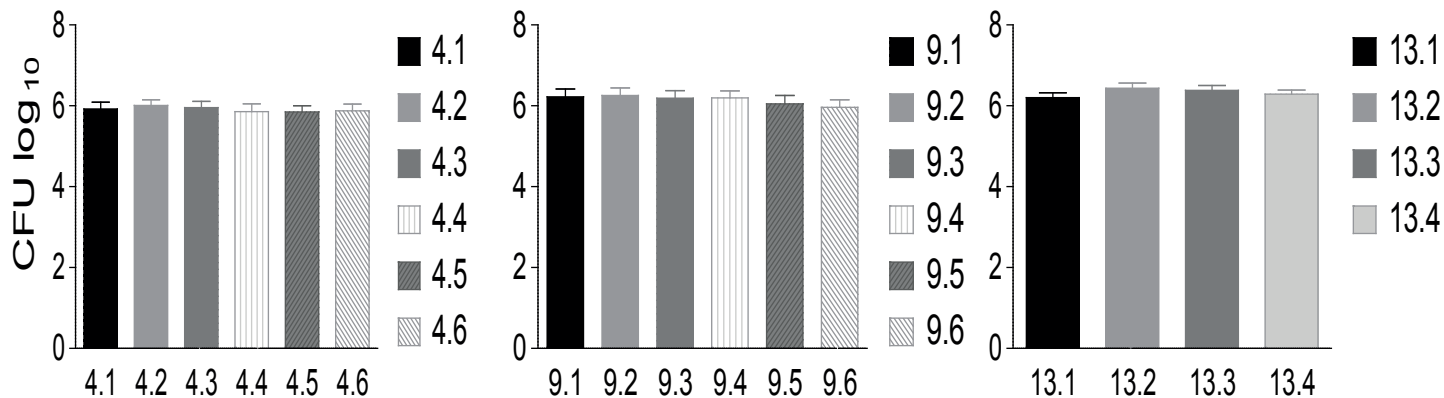

**FIG S2** Bone marrow derived murine macrophages were infected with clinical stains, collected in chronological order, at a MOI of 10. After two hours of infection, cells were washed and lysed to analyze uptake. Uptake is represented as log CFU and designated as zero hour.

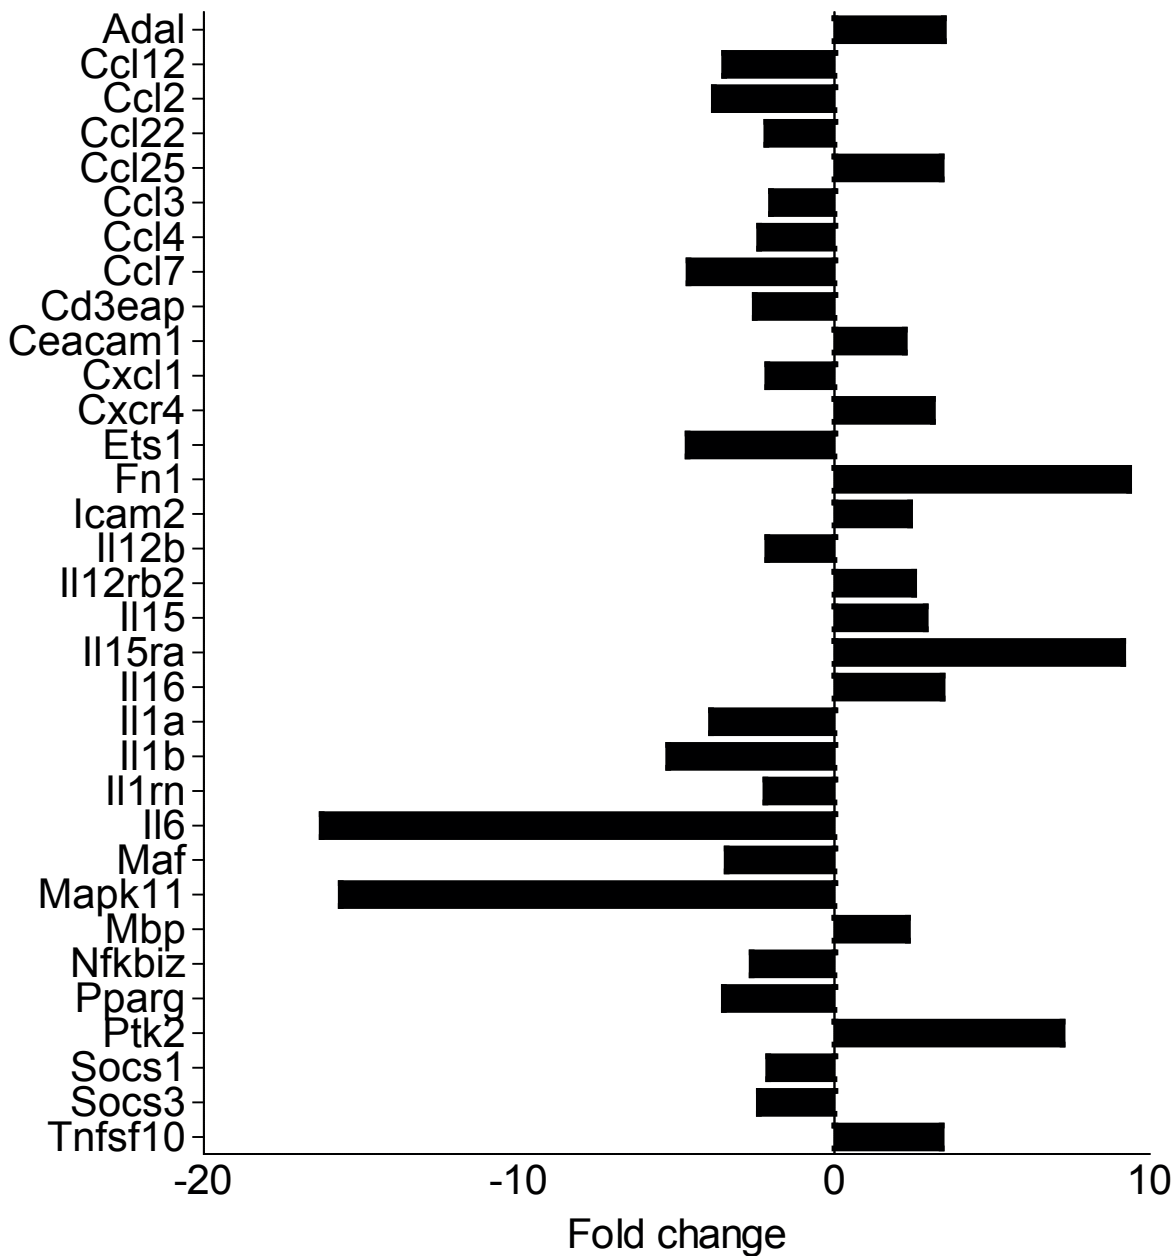

**FIG S3** Nanostring data. Murine BMDMs were infected with the first and last clinical isolate of Mav (9.1 and 9.6) at a MOI of 10. After 6 hours post infection, cells were lysed in RLT buffer and subsequently RNA was extracted to perform nanostring analysis. nCounter® GX Mouse Inflammation Kit was used and the results were analyzed on *Partek® Genomics Suite®* software.

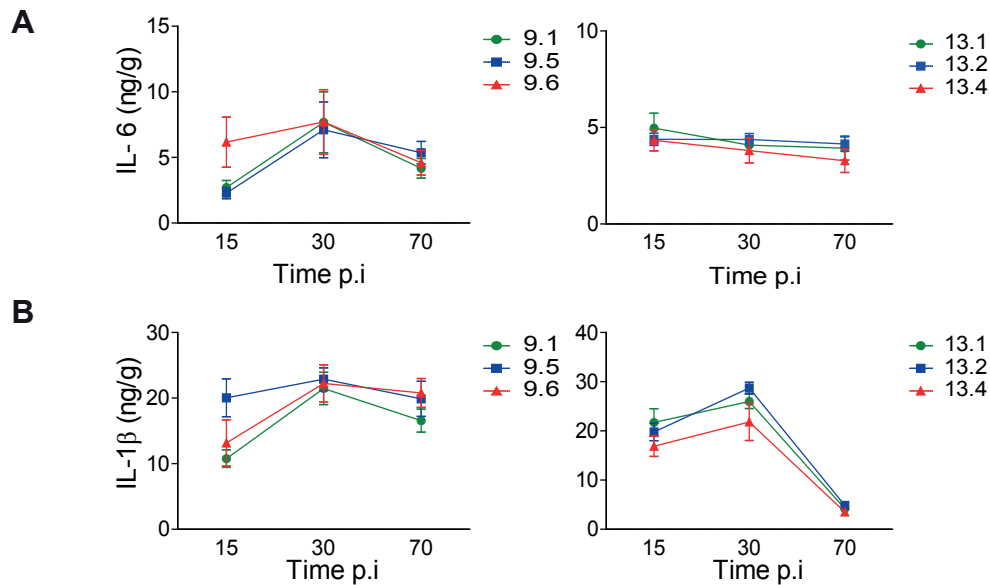

**FIG S4** Proinflammatory cytokines IL-6 (A) and IL-1 $\beta$  (B) measured from liver homogenates.

Results are presented as ng cytokine per gram tissue.

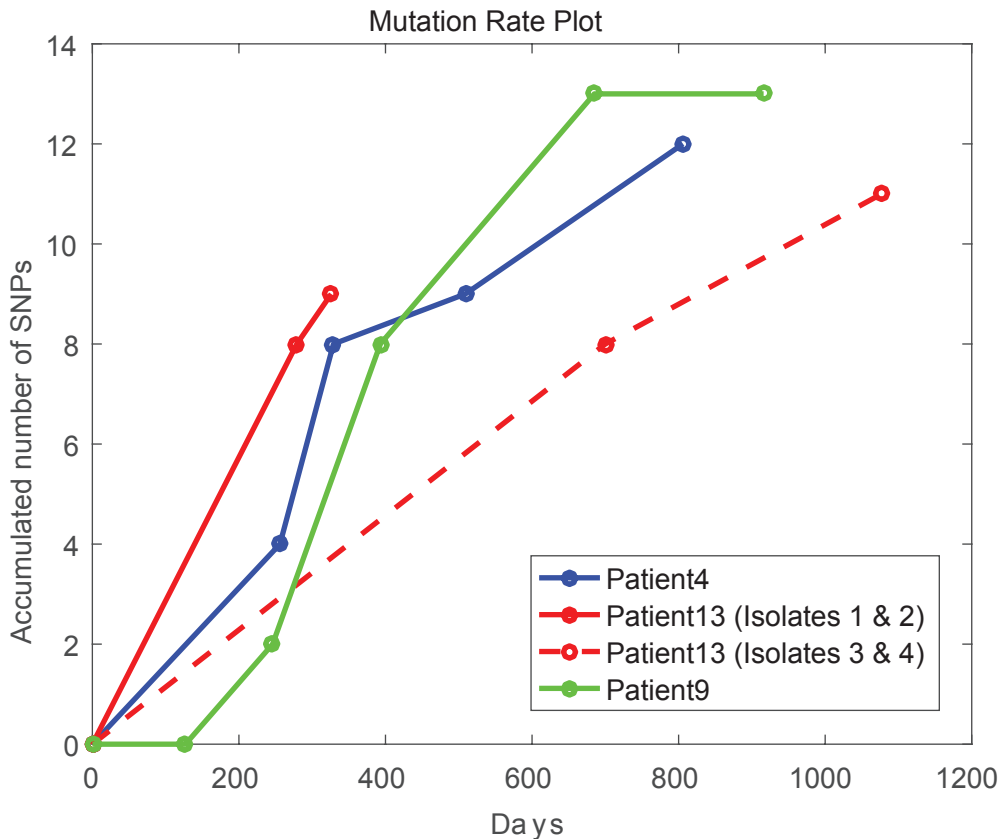

**FIG S5** Accumulated number of SNPs, accounting for sub clones. SNPs were counted relative to Mav 104 for patients 9 and 13. The isolates from patient 13 were treated as two separate lineages (13.1-2 and 13.3-4). For patient 4, SNPs in isolates 4.2-4.6 were counted relative to 4.2.

## 1 **Supplementary material and method**

### 2 **Melting curve assay**

3 Quantitative Real-time Polymerase Chain Reaction (qRT-PCR) with melting curve  
4 analysis was performed on the patient isolates to confirm species identity, using Light Cycler®  
5 Fast Start DNA Master HybProbe Kit (Roche). DNA extraction was performed, using a  
6 NucliSENS® easyMAG® automated system (bioMerieux Clinical Diagnostics). The primers used  
7 to amplify the 16S rRNA gene region were MycoF: 5'-ACGGAAAGGTCTCTTCG-3' and  
8 MycoR: 5'- GTCGTCGCCTTGGTAG-3'. The fluorogenic hybridization probes used were Myco  
9 Probe1: 5'-ATGTCTTGTGGTGGAAAGCG-fluorescein isothiocyanate-3' and  
10 Myco Probe2: 5'-LC Red 640-TTAGCGGTGTGGGATGAGCCC-phosphate-3'. Mtb *H37Rv*,  
11 Mav 104 and *M. intracellulare* were used as mycobacterial reference strains.

12

### 13 **Phylogenetic Analysis**

14 A multiple alignment of the genome sequences from clinical strains and reference strain  
15 Mav 104 (NC\_008595.1) and H87 was generated using MUMmer 3.23 (1). SNPs were extracted  
16 from the multiple using a script (filtering out heterogeneous and low-coverage sites, as above).  
17 Sites involving indels in any of the isolates were also excluded. This resulted in a set of 12,560  
18 polymorphic sites genome-wide. A phylogenetic tree was constructed by the maximum parsimony  
19 method (*dnapars*) in Phylip 3.66 (2).

20

### 21 **Identification of Single Nucleotide Polymorphisms (SNPs)**



22 SNPs in the isolates from each patient were identified by aligning the assembled genome  
23 sequence from the first isolate to the sequences from isolates from each subsequent time point.  
24 SNPs resulting from heterogeneous nucleotide calls (<70% pure) or low-coverage regions (depth  
25 < 10) were filtered out.

26

### 27 **Estimation of in vivo Mutation Rate**

28 The apparent *in vivo* mutation rate of Mav was estimated by calculating the accumulated  
29 number of SNPs observed in each patient (compared to the first isolate) at each subsequent time  
30 point, divided by the time elapsed (in fractions of a year). For the second analysis, each isolate was  
31 compared to Mav 104. The 4-6 observations for each patient were fit to a Poisson distribution to  
32 derive the maximum likelihood estimate of the mean rate of accumulation of SNPs in each patient,  
33 along with 95% confidence intervals for the parameter estimates, using *poissfit* (rate\_day\*365) in  
34 MATLAB.

35

### 36 **Nanostring screen**

37 Murine BMDMs were infected with the first and last clinical isolate of patient 9 (9.1 and  
38 9.6) at a MOI of 10, for 6 hours. Cells were lysed in RLT buffer and subsequently RNA was  
39 extracted (Qiagen) to perform nanostring analysis. nCounter® GX Mouse Inflammation Kit  
40 (Nanostring technologies) was used to perform nanostring analysis on 100ng of RNA on a  
41 nCounter® digital analyzer (Nanostring technologies). Subsequently, values were imported into  
42 *Partek® Genomics Suite®* software for analysis where, 20 subtracted from normalized number of  
43 mRNA molecules, and set lowest value to 1, thereafter values were log<sub>2</sub>-transformed and two-way

44 ANOVA was performed. Genes with a two-fold or higher (induced or repressed) change in  
45 expression level in macrophages infected with the last isolate compared to the first isolate were  
46 represented.

#### 47 **Cytokine quantification from infected macrophages**

48 Macrophages were seeded at 200,000 cells/well in a 24 well plate and infected with Mav clinical  
49 isolates at a MOI of 10 for two hours before cells were washed to eliminate extracellular  
50 bacteria. Supernatants were harvested at 2h, 6h, 1, 3 and 7 days. IL-6 and IL-1 $\beta$  ELISAs (both  
51 from R&D systems) were performed on the supernatants according to the manufacturer's  
52 protocol.

53

#### 54 **Reference**

- 55 1. Kurtz S, Phillippy A, Delcher AL, Smoot M, Shumway M, Antonescu C, Salzberg SL.  
56 2004. Versatile and open software for comparing large genomes. *Genome Biol* 5:R12.
- 57 2. Felsenstein J. 1989. PHYLIP - Phylogeny Inference Package. *Cladistics* 5:163–166.

58

**Table S1** Medical history and time line of sample collection for all the patients in the study.

| <b>Patient</b> | <b>Sex-age</b> | <b>Clinical history</b>                                                                                             | <b>First isolate</b> | <b>Last isolate</b> | <b>Interpretation</b>                                           | <b>Treatment (start date)</b>                                                                                                      |
|----------------|----------------|---------------------------------------------------------------------------------------------------------------------|----------------------|---------------------|-----------------------------------------------------------------|------------------------------------------------------------------------------------------------------------------------------------|
| <b>1</b>       | F-50           | Infiltrate right lung top in 2004, <sup>1</sup> COPD grade I                                                        | 22.03.2006           | 01.06.2007          | Asymptomatic colonization                                       | No                                                                                                                                 |
| <b>2</b>       | M- 1 month     | Lymphadopathy right side of neck                                                                                    | 29.12.2008           | 09.02.2009          | Infection                                                       | No, surgical removal.                                                                                                              |
| <b>3</b>       | F-57           | Lung abscess in 1963, smoker, COPD grade 3-4, multiple cavernae and infiltrates, insulin dependent diabetes type II | 10.08.2007           | 26.10.2010          | First considered asymptomatic colonization, later as infection. | Rifampicin, myambutol and clarithromycin                                                                                           |
| <b>4</b>       | M-65           | Smoker, COPD, bulla and cavernae right lung top                                                                     | 23.03.2007           | 01.07.2010          | Infection                                                       | First rifampicin, isoniazid and pyrazinamide, then ethambutol and clarithromycin. Treatment stopped due to resistance to all drugs |
| <b>5</b>       | F-61           | COPD/ emphysema grade 4, recurrent chest infections                                                                 | 23.05.2003           | 05.01.2005          | Asymptomatic colonization                                       | No                                                                                                                                 |
| <b>7</b>       | M-55           | Colonic cancer diagnosed in 2003, chemotherapy, metastases to lung, chronic bronchitis?                             | 07.12.2005           | 25.05.2007          | Infection                                                       | Rifabutin, clarithromycin and ethambutol                                                                                           |
| <b>8</b>       | F-71           | Lung infiltrate with necrosis with granulomatous inflammation                                                       | 22.05.2008           | 25.05.2008          | Uncertain                                                       | Regress of infiltrate without antimycobacterial treatment                                                                          |
| <b>9</b>       | F-65           | Bilateral lung infiltrates with bronchiectasis, cavernae and fibrosis                                               | 07.04.2005           | 10.10.2007          | Infection                                                       | Rimactan and ethambutol                                                                                                            |
| <b>10</b>      | M-77           | Severe bilateral lung fibrosis, MAC since 1990                                                                      | 24.05.2005           | 21.09.2007          | Colonization                                                    | No                                                                                                                                 |

|           |      |                                                                                         |            |            |              |                                                                    |
|-----------|------|-----------------------------------------------------------------------------------------|------------|------------|--------------|--------------------------------------------------------------------|
| <b>11</b> | F-85 | Pneumonia, lung infiltrate                                                              | 07.07.2009 | 22.09.2010 | Colonization | No, regression of infiltrate without antimycobacterial treatment   |
| <b>12</b> | M-61 | COPD/emphysema grade 4, caverna left lung top, infiltrate right midfield                | 09.04.2006 | 28.02.2007 | Colonization | No,                                                                |
| <b>13</b> | F-83 | Bronchiectasis, infiltrates and cavernae in both lung tops                              | 20.12.2006 | 25.02.2009 | Infection    | No (risk of side effects, and patient not motivated for treatment) |
| <b>15</b> | F-55 | Mild obstructive and restrictive lung disease, recurrent pneumonia, midfield infiltrate | 19.01.2006 | 19.12.2006 | Colonization | No, regress of infiltrate without antimycobacterial treatment      |

---

<sup>i</sup> Chronic Obstructive Pulmonary Disease (COPD)

**Table S2** List of genes containing SNPs. Both synonymous and non-synonymous mutations were observed. Putative gene function mentioned for non-synonymous mutations. Mav 104 reference from KEGG database was used to annotate function. Mutations marked in red occur in or upstream of genes putatively related to drug resistance.

|                  | 4.1 | 4.2               | 4.3               | 4.4               | 4.5               | 4.6               | Annotations for Non-synonymous Mutations              |
|------------------|-----|-------------------|-------------------|-------------------|-------------------|-------------------|-------------------------------------------------------|
| <b>Days</b>      | 0   | 390               | 646               | 719               | 899               | 1196              |                                                       |
| <b>*nc228631</b> |     |                   |                   |                   |                   | g>t               | -57 bp upstream of <i>embB</i> (pseudogene)           |
| <b>MAV_0570</b>  |     |                   | V62I              | V62I              | V62I              | V62I              |                                                       |
| <b>MAV_0809</b>  |     |                   | L256L             | L256L             | L256L             | L256L             |                                                       |
| <b>MAV_1067</b>  |     | A128S             | A128S             | A128S             | A128S             | A128S             | Glutamate synthetase                                  |
| <b>MAV_1092</b>  |     |                   |                   |                   |                   | +g (ins)          |                                                       |
| <b>MAV_1302</b>  |     |                   | R27R              | R27R              | R27R              | R27R              |                                                       |
| <b>MAV_1393</b>  |     |                   |                   |                   |                   | Y243C             |                                                       |
| <b>nc1491618</b> |     |                   |                   | a>c               | a>c               | a>c               | 16S rRNA                                              |
| <b>MAV_1537</b>  |     |                   |                   | Q366E             |                   |                   | AraC transcriptional regulator                        |
| <b>MAV_1658</b>  |     |                   |                   | transposon ins    | transposon ins    | transposon ins    | ortholog of Eis (aminoglycoside acetyltransferase)    |
| <b>MAV_2013</b>  |     | H1206Y            | H1206Y            | H1206Y            | H1206Y            | H1206Y            | Mycobactin peptide synthetase MbtE                    |
| <b>MAV_2717</b>  |     |                   |                   | T170A             |                   |                   | Thiamine biosynthesis/ tRNA modification protein ThiI |
| <b>MAV_3418</b>  |     |                   | R493R             | R493R             | R493R             | R493R             |                                                       |
| <b>MAV_3565</b>  |     | R221R             | R221R             | R221R             | R221R             | R221R             |                                                       |
| <b>MAV_3604</b>  |     | E51D              | E51D              | E51D              | E51D              | E51D              |                                                       |
| <b>MAV_3626</b>  |     | A136V             | A136V             | A136V             | A136V             | A136V             |                                                       |
| <b>MAV_4065</b>  |     | cluster of 4 SNPs | cluster of 4 SNPs | cluster of 4 SNPs | cluster of 4 SNPs | cluster of 4 SNPs | CheR methyltransferase                                |
| <b>MAV_4503</b>  |     | E254Q             |                   |                   |                   |                   | RpoB; DNA-                                            |

directed RNA  
polymerase, beta  
subunit

|          |       |       |       |       |                                             |
|----------|-------|-------|-------|-------|---------------------------------------------|
| MAV_4827 | T330T | T330T | T330T | T330T | T330T                                       |
| MAV_4838 | A289T | A289T | A289T | A289T | A289T                                       |
| MAV_5303 |       |       |       | G205S | putative N-acetylmuramoyl-L-alanine amidase |

\* 'nc' means SNP occurs in a non-coding (or intergenic) region. The coordinate given is based on an alignment to the genome sequence of *M. avium* 104.

|           | 9.1 | 9.2 | 9.3   | 9.4    | 9.5   | 9.6   | Annotations for Non-synonymous Mutations    |
|-----------|-----|-----|-------|--------|-------|-------|---------------------------------------------|
| Days      | 0   | 127 | 246   | 393    | 685   | 916   |                                             |
| MAV_0211  |     |     | A42V  |        |       |       |                                             |
| MAV_5106  |     |     | Q525K |        |       |       | gamma-HCH transport system permease protein |
| MAV_0166  |     |     |       | A1230T |       |       | ferredoxin-dependent glutamate synthase 1   |
| MAV_2082  |     |     |       | -c     |       |       | ABC transporter                             |
| MAV_2786  |     |     |       | A178P  |       |       | phosphatidylethanolamine-binding protein    |
| MAV_3145  |     |     |       | E348D  |       |       | exinuclease subunit B                       |
| nc4424251 |     |     |       | g>t    |       |       | in 20kb insertion in MAV_4292               |
| MAV_4983  |     |     |       | G33V   |       |       | molybdopterin oxidoreductase                |
| MAV_0141  |     |     |       |        | I161L | I161L | nitrate/sulfate/bicarbonate transporter     |
| nc223899  |     |     |       |        | t>c   | t>c   | <i>embB</i> (pseudogene)                    |
| nc1488761 |     |     |       |        | g>t   |       | 16S rRNA                                    |
| MAV_3262  |     |     |       |        | C175* |       | glycosyl transferase                        |
| nc4439295 |     |     |       |        | c>t   |       | near MAV_4309                               |

|           | 13.1 | 13.2  | 13.3  | 13.4  | Annotations for Non-synonymous Mutations        |
|-----------|------|-------|-------|-------|-------------------------------------------------|
| Days      | 0    | 47    | 421   | 798   |                                                 |
| MAV_0030  |      |       | L4L   | L4L   |                                                 |
| MAV_0048  |      |       |       | A488E | conserved hypothetical protein                  |
| MAV_0182  |      |       |       | K38T  | superoxide dismutase, Fe-Mn family              |
| MAV_0382  |      |       | P452A | P452A |                                                 |
| MAV_0650  |      |       | A297S | A297S |                                                 |
| MAV_1043  |      |       | E173E | E173E |                                                 |
| MAV_2305  |      |       | L206L | L206L |                                                 |
| MAV_2316  |      |       | S324P | S324P | conserved hypothetical protein                  |
| MAV_2756  |      |       | Y150H | Y150H | methyltransferase                               |
| MAV_2838  |      | F267V |       |       | homologue to the OxyR transcriptional regulator |
| MAV_2876  |      |       | +agtg | +agtg |                                                 |
| MAV_2967  |      |       | L146S | L146S | transcriptional regulator, TetR family protein  |
| MAV_3155  |      |       | M28K  |       | DNA polymerase I                                |
| MAV_3749  |      | K323E | K323E | K323E | DNA processing protein; smf family protein      |
| MAV_4147  |      |       | L239L | L239L |                                                 |
| MAV_4190  |      |       | P144T | P144T |                                                 |
| MAV_4900  |      |       | R289R | R289R |                                                 |
| MAV_4964  |      |       |       | S239P | conserved hypothetical protein                  |
| nc5110983 |      |       | t>c   |       | near MAV_4966                                   |
| MAV_5255  |      |       | D46D  | D46D  |                                                 |

**Table S3** List of genes containing mutations (relative to Mav104, as an outgroup). Both synonymous and non-synonymous mutations were observed. Putative gene function mentioned for non-synonymous mutations. *M. avium* 104 reference from KEGG database was used to annotate function. The mutations for patient 13 are highlighted in red and blue to emphasize the two sub-series of isolates, (13.1, and 13.2) and (13.3, and 13.4). The mutations for patient 4 are highlighted in red and blue to emphasize the two sub-series of isolates (4.1) and (4.2-4.6). Mutations in putative drug-resistance genes have been removed.

|                        | 4.1               | 4.2    | 4.3    | 4.4    | 4.5    | 4.6      | Annotations for Non-synonymous Mutations              |
|------------------------|-------------------|--------|--------|--------|--------|----------|-------------------------------------------------------|
| <b>Days (from 4.2)</b> | NA                | 0      | 256    | 329    | 509    | 806      |                                                       |
| MAV_0570               |                   |        | V62I   | V62I   | V62I   | V62I     |                                                       |
| MAV_0809               |                   |        | L256L  | L256L  | L256L  | L256L    |                                                       |
| MAV_1067               |                   | A128S  | A128S  | A128S  | A128S  | A128S    | Glutamate synthetase                                  |
| MAV_1092               |                   |        |        |        |        | +g (ins) |                                                       |
| MAV_1302               |                   |        | R27R   | R27R   | R27R   | R27R     |                                                       |
| MAV_1393               |                   |        |        |        |        | Y243C    |                                                       |
| MAV_1537               |                   |        |        | Q366E  |        |          | AraC transcriptional regulator                        |
| MAV_2013               |                   | H1206Y | H1206Y | H1206Y | H1206Y | H1206Y   | Mycobactin peptide synthetase MbtE                    |
| MAV_2717               |                   |        |        | T170A  |        |          | Thiamine biosynthesis/ tRNA modification protein ThiI |
| MAV_3418               |                   |        | R493R  | R493R  | R493R  | R493R    |                                                       |
| MAV_3565               | R221R             |        |        |        |        |          |                                                       |
| MAV_3604               | D51E              |        |        |        |        |          |                                                       |
| MAV_3626               |                   | A136V  | A136V  | A136V  | A136V  | A136V    |                                                       |
| MAV_4065               | cluster of 4 SNPs |        |        |        |        |          | CheR methyltransferase                                |
| MAV_4827               | T330T             |        |        |        |        |          |                                                       |
| MAV_4838               |                   | A289T  | A289T  | A289T  | A289T  | A289T    |                                                       |
| MAV_5303               |                   |        |        |        | G205S  |          | putative N-acetylmuramoyl-L-alanine                   |



---

amidase

---

\* 'nc' means SNP occurs in a non-coding (or intergenic) region. The coordinate given is based on an

|                        | <b>9.1</b> | <b>9.2</b> | <b>9.3</b> | <b>9.4</b> | <b>9.5</b> | <b>9.6</b> | <b>Annotations for Non-synonymous Mutations</b> |
|------------------------|------------|------------|------------|------------|------------|------------|-------------------------------------------------|
| <b>Days (from 9.1)</b> | 0          | 127        | 246        | 393        | 685        | 916        |                                                 |
| <b>MAV_0211</b>        |            |            | A42V       |            |            |            |                                                 |
| <b>MAV_5106</b>        |            |            | Q525K      |            |            |            | gamma-HCH transport system permease protein     |
| <b>MAV_0166</b>        |            |            |            | A1230T     |            |            | ferredoxin-dependent glutamate synthase 1       |
| <b>MAV_2082</b>        |            |            |            | -c         |            |            | ABC transporter                                 |
| <b>MAV_2786</b>        |            |            |            | A178P      |            |            | phosphatidylethanolamine-binding protein        |
| <b>MAV_3145</b>        |            |            |            | E348D      |            |            | exinuclease subunit B                           |
| <b>nc4424251</b>       |            |            |            | g>t        |            |            |                                                 |
| <b>MAV_4983</b>        |            |            |            | G33V       |            |            | molybdopterin oxidoreductase                    |
| <b>MAV_0141</b>        |            |            |            |            | I161L      | I161L      | nitrate/sulfate/bicarbonate transporter         |
| <b>MAV_3262</b>        |            |            |            |            | C175*      |            | glycosyl transferase                            |
| <b>nc4439295</b>       |            |            |            |            | c>t        |            |                                                 |

---

alignment to the genome sequence of *M. avium* 104.

|                                             | 13.1  | 13.2  | 13.3  | 13.4  | Annotations for<br>Non-synonymous<br>Mutations       |
|---------------------------------------------|-------|-------|-------|-------|------------------------------------------------------|
| <b>Days<br/>(from first<br/>diagnosis*)</b> | 279   | 326   | 700   | 1077  |                                                      |
| <b>MAV_0030</b>                             | L4L   | L4L   |       |       |                                                      |
| <b>MAV_0048</b>                             |       |       |       | A488E | conserved<br>hypothetical<br>protein                 |
| <b>MAV_0182</b>                             |       |       |       | K38T  | superoxide<br>dismutase, Fe-Mn<br>family             |
| <b>MAV_0382</b>                             |       |       | P452A | P452A |                                                      |
| <b>MAV_0650</b>                             | S297A | S297A |       |       |                                                      |
| <b>MAV_1043</b>                             | E173E | E173E |       |       |                                                      |
| <b>MAV_2305</b>                             |       |       | L206L | L206L |                                                      |
| <b>MAV_2316</b>                             |       |       | S324P | S324P | conserved<br>hypothetical<br>protein                 |
| <b>MAV_2756</b>                             |       |       | Y150H | Y150H | methyltransferase                                    |
| <b>MAV_2876</b>                             | -agtg | -agtg |       |       |                                                      |
| <b>MAV_2967</b>                             |       |       | L146S | L146S | transcriptional<br>regulator, TetR<br>family protein |
| <b>MAV_3155</b>                             |       |       | M28K  |       | DNA polymerase I                                     |
| <b>MAV_3749</b>                             | E323K |       |       |       | DNA processing<br>protein; smf<br>family protein     |
| <b>MAV_4147</b>                             | L239L | L239L |       |       |                                                      |
| <b>MAV_4190</b>                             | T144P | T144P |       |       |                                                      |
| <b>MAV_4900</b>                             |       |       | R289R | R289R |                                                      |
| <b>MAV_4964</b>                             |       |       |       | S239P | conserved<br>hypothetical<br>protein                 |
| <b>nc5110983</b>                            |       |       | t>c   |       |                                                      |
| <b>MAV_5255</b>                             | D46D  | D46D  |       |       |                                                      |

\* For patient 13, 279 days from the first diagnosis was added as an estimate of the time in-patient during which mutations accumulated, assuming that the two lineages accumulated distinct sets of mutations from a common progenitor during the course of infection.

**Table S4** Description of mycobacterial isolates; Specimen type, Specimen location, microscopy quantification and concentration of bacteria

| Patient ID | Isolate ID | Specimen received date | Specimen type | Specimen location | Microscopy                   | Concentration of Bacteria |
|------------|------------|------------------------|---------------|-------------------|------------------------------|---------------------------|
| 1          | 1-1        | 22/03/2006             | BAL           | lung              | AFB not detected             | low                       |
| 1          | 1-2        | 1/06/2007              | BAL           |                   | AFB not detected             | low                       |
| 2          | 2-1        | 29/12/2008             | Abscess       | Neck              | Not done                     | Uncertain                 |
| 2          | 2-2        | 9/02/2009              | Tissue biopsy | Neck              | AFB detected, not quantified | Uncertain                 |
| 3          | 14-1       | 10/08/2007             | BAL           | Lung              | AFB not detected             | low                       |
| 3          | 14-2       | 19/12/2008             | Sputum        | Lung              | >9 AFB/field                 | high                      |
| 3          | 3-1        | 26/01/2010             | BAL           | Lung              | >9 AFB/field                 | high                      |
| 3          | 3-2        | 5/08/2010              | Sputum        | Lung              | Not done                     | Uncertain                 |
| 3          | 3-3        | 26/10/2010             | Sputum        | Lung              | AFB detected, not quantified | Uncertain                 |
| 4          | 6-1        | 23/03/2007             | Sputum        | Lung              | >9 AFB/field                 | high                      |
| 4          | 6-2        | 16/04/2008             | Sputum        | Lung              | 10 AFB/field                 | high                      |
| 4          | 6-3        | 28/12/2008             | Sputum        | Lung              | >9 AFB/field                 | high                      |
| 4          | 4-1        | 11/03/2009             | Sputum        | Lung              | >9 AFB/field                 | high                      |
| 4          | 4-2        | 7/09/2009              | Sputum        | Lung              | >9 AFB/field                 | high                      |
| 4          | 4-3        | 1/07/2010              | BAL           | Lung              | AFB not detected             | low                       |
| 5          | 5-1        | 23/05/2003             | Sputum        | Lung              | AFB not detected             | low                       |
| 5          | 5-2        | 5/01/2005              | BAL           | Lung              | AFB not detected             | low                       |

|    |      |            |                       |                                       |                              |      |
|----|------|------------|-----------------------|---------------------------------------|------------------------------|------|
| 7  | 7-1  | 7/12/2005  | Bal                   | Lung                                  | 2 AFB/300 fields             | high |
| 7  | 7-2  | 25/05/2007 | Transbronchial biopsy | Lung                                  | AFB not detected             | low  |
| 8  | 8-1  | 22/05/2008 | Sputum                | Lung                                  | >9 AFB/field                 | high |
| 8  | 8-2  | 26/05/2008 | Transbronchial biopsy | Lung                                  | AFB detected, not quantified | high |
| 9  | 9-1  | 7/04/2005  | Sputum                | Lung                                  | 1 AFB/field                  | high |
| 9  | 9-2  | 12/08/2005 | Sputum                | Lung                                  | 5 AFB/100 fields             | high |
| 9  | 9-3  | 9/12/2005  | Sputum                | Lung                                  | 5 AFB/field                  | high |
| 9  | 9-4  | 5/05/2006  | Sputum                | Lung                                  | >9 AFB/field                 | high |
| 9  | 9-5  | 21/02/2007 | Sputum                | Lung                                  | >9 AFB/field                 | high |
| 9  | 9-6  | 10/10/2007 | Sputum                | Lung                                  | 1 AFB/5 fields               | high |
| 10 | 10-1 | 25/04/2005 | Sputum                | Lung                                  | 3 AFB/10 fields              | high |
| 10 | 10-2 | 11/06/2007 | Sputum                | Lung                                  | AFB not detected             | low  |
| 10 | 10-3 | 21/09/2007 | Tissue?               | Not specified, probably transbrochial | AFB not detected             | low  |
| 11 | 11-1 | 7/07/2009  | BAL                   | Lung                                  | AFB not detected             | low  |
| 11 | 11-2 | 22/09/2010 | Sputum                | Lung                                  | AFB not detected             | low  |
| 12 | 12-1 | 9/04/2006  | Sputum                | Lung                                  | >9 AFB/field                 | high |
| 12 | 12-2 | 28/02/2007 | Sputum                | Lung                                  | >9 AFB/field                 | high |
| 13 | 13-1 | 20/12/2006 | Sputum                | Lung                                  | AFB not detected             | low  |
| 13 | 13-2 | 5/02/2007  | Sputum                | Lung                                  | AFB not detected             | low  |
| 13 | 13-3 | 14/02/2008 | BAL                   | Lung                                  | AFB not detected             | low  |
| 13 | 13-4 | 25/02/2009 | Sputum                | Lung                                  | 6 AFB/field                  | high |
| 15 | 15-1 | 19/01/2006 | BAL                   | Lung                                  | AFB not detected             | low  |
| 15 | 15-2 | 19/12/2006 | Sputum                | Lung                                  | AFB not detected             | low  |

**Table S5.** MAV genes potentially related to drug resistance. This list was generated by identifying orthologs in the *M. avium* 104 genome of genes related to drug resistance in *M. tuberculosis* for drugs commonly used to treat mycobacterial infections (1).

|                                  |         |               |
|----------------------------------|---------|---------------|
| MAV_0005                         | Rv0005  | <i>gyrB</i>   |
| MAV_0006                         | Rv0006  | <i>gyrA</i>   |
| MAV_0173                         | Rv3855  | <i>ethR</i>   |
| MAV_0175                         | Rv3854c | <i>ethA</i>   |
| MAV_0225                         | Rv3794  | <i>embA</i>   |
| MAV_0224                         | Rv3795  | <i>embB</i>   |
| MAV_0229                         | Rv3793  | <i>embC</i>   |
| MAV_0595                         | Rv3566c | <i>nat</i>    |
| MAV_1418                         | Rv1267c | <i>embR</i>   |
| MAV_1658                         | Rv2416c | <i>eis</i>    |
| MAV_1725                         | Rv2447c | <i>folC</i>   |
| MAV_2190                         | Rv2247  | <i>accD6</i>  |
| MAV_2192                         | Rv2245  | <i>kasA</i>   |
| MAV_2194                         | Rv2243  | <i>fabD</i>   |
| MAV_2472                         | Rv2043c | <i>pncA</i>   |
| MAV_2752                         | Rv1909c | <i>furA</i>   |
| MAV_2753                         | Rv1908c | <i>katG</i>   |
| MAV_2839                         | Rv2428  | <i>ahpC</i>   |
| MAV_2867                         | Rv1854c | <i>ndh</i>    |
| MAV_2944                         | Rv1772  | -             |
| MAV_2992                         | Rv0678  | -             |
| MAV_3077                         | Rv1694  | <i>tlyA</i>   |
| MAV_3152                         | Rv1630  | <i>rpsA</i>   |
| MAV_3294                         | Rv1484  | <i>inhA</i>   |
| MAV_3295                         | Rv1483  | <i>fabG1</i>  |
| MAV_3652                         | Rv2764c | <i>thyA</i>   |
| MAV_3702                         | Rv2846c | <i>efpA</i>   |
| MAV_4018                         | Rv3139  | <i>fadE24</i> |
| MAV_4231                         | Rv3266c | <i>rmlD</i>   |
| MAV_4471                         | Rv0701  | <i>rplC</i>   |
| MAV_4492                         | Rv0682  | <i>rpsL</i>   |
| MAV_4503                         | Rv0667  | <i>rpoB</i>   |
| MAV_4664                         | Rv0486  | <i>mshA</i>   |
| MAV_5183                         | Rv0129c | <i>fbpC</i>   |
| MAV_5308                         | Rv3919c | <i>gid</i>    |
| MAV_2838                         | Rv2427A | <i>oxyR</i>   |
| 5 kb region around coord 1.49 Mb | Rvnr01  | <i>rrs</i>    |

1. Mortimer TD, Weber AM, Pepperell CS. 2018. Signatures of Selection at Drug Resistance Loci in *Mycobacterium tuberculosis*. *mSystems* 3.

**Table S6 : Primers for Sanger Sequencing**

| <b>Gene</b>     | <b>Primer</b> | <b>Sequence</b>                |
|-----------------|---------------|--------------------------------|
| Pat4_MAV_1067   | Forward       | 5'AAGCTCGGCTCCGGCAAACCTG3'     |
| Pat4_MAV_1067   | Reverse       | 5'CACCCAGCGAGCTCAGGC3'         |
| Pat4_MAV_1537   | Forward       | 5'CGTTTGGTCGCCGCTAC 3'         |
| Pat4_MAV_1537   | Reverse       | 5'GCAATTGTGTTTCGGGCGC 3'       |
| Pat4_MAV_2717   | Forward       | 5' GACCTGGGGTGGCCGGTC 3'       |
| Pat4_MAV_2717   | Reverse       | 5' ATCGCAGGCCAGTCCGCG 3'       |
| Pat4_MAV_5303   | Forward       | 5'GTCCGCCGATCGGGCCCC 3'        |
| Pat4_MAV_5303   | Reverse       | 5'CAGCGGGCTGCGGTTGACC 3'       |
| Pat9_MAV_0141   | Forward       | 5' CCGTACTTCTTCCTGTTGC 3'      |
| Pat9_MAV_0141   | Reverse       | 5'CAGCACACCCGCCGGAGTT 3'       |
| Pat9_MAV_0166   | Forward       | 5' GTGAAGTCGCTGGACACCAC 3'     |
| Pat9_MAV_0166   | Reverse       | 5' AGAACCGCACCCGGCTTGCC 3'     |
| Pat9_MAV_2786-F | Forward       | 5'GGCTCCGGCAGCACGTCC 3'        |
| Pat9_MAV_2786-R | Reverse       | 5' CGCGGCGGCGCCGATCGT 3'       |
| Pat13_MAV_0182  | Forward       | 5'GTGGCTGAATACACCCTG 3'        |
| Pat13_MAV_0182  | Reverse       | 5'CAGGTGGAAGGCGAGGTT3'         |
| Pat13_MAV_2756  | Forward       | 5'AGCAACGAAGGCGGCCACG 3'       |
| Pat13_MAV_2756  | Reverse       | 5'CTGGGACCTGATGCGGCGA 3'       |
| Pat13_MAV_3155  | Forward       | 5'GTGCCCGCCACGAAAGCCG 3'       |
| Pat13_MAV_3155  | Reverse       | 5'CAGCAGGTTGATCAGCATCGC3'      |
| Pat13_MAV_3749  | Forward       | 5'ATCGGCCACATCGGCGAATTGG<br>3' |
| Pat13_MAV_3749  | Reverse       | 5' CTGGCGGCGCACCAGCCC 3'       |
